# Supplementary material for: Designing a Next-Generation Multiepitope-Based Vaccine against Staphylococcus aureus Using Reverse Vaccinology Approaches
Source: MDPI journal article supplement (doi:10.3390/pathogens12030376), 2023-02-25
Supplement: s1 [file s1]

**Supplementary Table S5.** Physicochemical Properties, secondary structure, and solubility analysis of final vaccine construct as predicted by ProtParam tool, PSIPRED, and SOLpro server.

| Parameters                                              | Vaccine Construction Sequence                                                                                         |    |       |
|---------------------------------------------------------|-----------------------------------------------------------------------------------------------------------------------|----|-------|
| Number of amino acids                                   | 207                                                                                                                   |    |       |
| Molecular weight                                        | 23.68 KDa                                                                                                             |    |       |
| Theoretical pI                                          | 9.46                                                                                                                  |    |       |
| Total number of negatively charged residues (Asp + Glu) | 13                                                                                                                    |    |       |
| Total number of positively charged residues (Arg + Lys) | 22                                                                                                                    |    |       |
| Instability index                                       | 12.73 (Stable)                                                                                                        |    |       |
| Aliphatic index                                         | 108.50                                                                                                                |    |       |
| Grand average of hydropathicity (GRAVY)                 | 0.502                                                                                                                 |    |       |
| The estimated half-life                                 | 30 hours (mammalian reticulocytes, in vitro).<br>>20 hours (yeast, in vivo)<br>>10 hours (Escherichia coli, in vivo). |    |       |
| Extinction coefficients                                 | 23840                                                                                                                 |    |       |
| Amino acid composition                                  | Ala (A)                                                                                                               | 27 | 13.0% |
|                                                         | Arg (R)                                                                                                               | 2  | 1.0%  |
|                                                         | Asn (N)                                                                                                               | 8  | 3.9%  |
|                                                         | Asp (D)                                                                                                               | 6  | 2.9%  |
|                                                         | Cys (C)                                                                                                               | 0  | 0.0%  |
|                                                         | Gln (Q)                                                                                                               | 2  | 1.0%  |
|                                                         | Glu (E)                                                                                                               | 7  | 3.4%  |
|                                                         | Gly (G)                                                                                                               | 12 | 5.8%  |

|                              |                                   |        |       |
|------------------------------|-----------------------------------|--------|-------|
|                              | His (H)                           | 2      | 1.0%  |
|                              | Ile (I)                           | 24     | 11.6% |
|                              | Leu (L)                           | 17     | 8.2%  |
|                              | Lys (K)                           | 20     | 9.7%  |
|                              | Met (M)                           | 9      | 4.3%  |
|                              | Phe (F)                           | 14     | 6.8%  |
|                              | Pro (P)                           | 10     | 4.8%  |
|                              | Ser (S)                           | 0      | 0.0%  |
|                              | Thr (T)                           | 18     | 8.7%  |
|                              | Trp (W)                           | 0      | 0.0%  |
|                              | Tyr (Y)                           | 16     | 7.7%  |
|                              | Val (V)                           | 13     | 6.3%  |
|                              | Pyl (O)                           | 0      | 0.0%  |
|                              | Sec (U)                           | 0      | 0.0%  |
| Atomic composition           | Carbon                            | C      | 1098  |
|                              | Hydrogen                          | H      | 1709  |
|                              | Nitrogen                          | N      | 247   |
|                              | Oxygen                            | O      | 278   |
|                              | Sulfur                            | S      | 9     |
| Secondary structure analysis | Alpha helix (Hh)                  | 53.14% |       |
|                              | Extended strand (Ee)              | 25.12% |       |
|                              | Random coil (Cc)                  | 21.73% |       |
| Solubility (SOLpro Server)   | SOLUBLE with probability 0.994267 |        |       |
