# Supplementary material for: Designing a Next-Generation Multiepitope-Based Vaccine against Staphylococcus aureus Using Reverse Vaccinology Approaches
Source: Pathogens. 2023 Feb 25;12(3):376. doi: 10.3390/pathogens12030376 (PMC10058999; doi:10.3390/pathogens12030376)
Supplement: Supplementary file 1 [file pathogens-12-00376-s001.zip]

Archive with 9 entries (9 files):
- Supplementary  Figure S1.jpg
- Supplementary  Figure S2.jpg
- Supplementary Table S1.xlsx
- Supplementary Table S2.xlsx
- Supplementary Table S3.xlsx
- Supplementary Table S4.xlsx
- Supplementary Table S5.pdf
- Supplementary Table S6.xlsx
- Supplementary Table S7.pdf
