# Supplementary material for: Designing a Next-Generation Multiepitope-Based Vaccine against Staphylococcus aureus Using Reverse Vaccinology Approaches
Source: Pathogens. 2023 Feb 25;12(3):376. doi: 10.3390/pathogens12030376 (PMC10058999; doi:10.3390/pathogens12030376)
Supplement: Supplementary file 1 [file pathogens-12-00376-s001.zip › Supplementary Table S1.xlsx]

## Sheet: Sheet1
Supplementary Table 1. Predicted B-cell epitopes epitopes from S.aureus Collagen binding protein and their corresponding immunogenic properties. The final selected epitopes to design multi-epitope vaccine construct from proteins has been highlighted in green colour.
Uniprot_ID	Epitope	Start position	Score	Antigencity	Antigencity Score	Allergicity	Toxicity	Hydrophobicity	Hydropathicity	Hydrophilicity	Charge	Mol wt.
Q53654	LKFMVFIMLL	6	0.69	ANTIGEN	2.1966	NON-ALLEREGEN	NON-TOXIN	0.35	2.56	-1.33	1	1254.86
	KDNQDGKRPE	546	0.67	ANTIGEN	2.3986	NON-ALLEREGEN	NON-TOXIN	-0.73	-3.18	1.84	0	1186.38
	APIANVKFKL	344	0.83	ANTIGEN	1.1725	NON-ALLEREGEN	NON-TOXIN	0	0.6	-0.24	2	1100.51
	TTIENAKAIE	421	0.77	ANTIGEN	0.5473	NON-ALLEREGEN	NON-TOXIN	-0.14	-0.32	0.38	-1	1089.35
	GKKIEYTVTE	521	0.76	ANTIGEN	1.1096	NON-ALLEREGEN	NON-TOXIN	-0.24	-0.92	0.56	0	1167.47
	TNTSDDKVAT	141	0.76	ANTIGEN	1.7564	NON-ALLEREGEN	NON-TOXIN	-0.32	-1.13	0.63	-1	1051.2
	VSKDITIKDQ	201	0.75	ANTIGEN	1.1323	NON-ALLEREGEN	NON-TOXIN	-0.28	-0.66	0.7	0	1146.45
	ANGEKVKTLD	563	0.73	ANTIGEN	1.6416	NON-ALLEREGEN	NON-TOXIN	-0.29	-0.96	0.8	0	1074.34
	NQNTTPVDKA	461	0.73	ANTIGEN	0.4024	NON-ALLEREGEN	NON-TOXIN	-0.34	-1.49	0.38	0	1087.29
	KSTNVTVHKS	156	0.73	ANTIGEN	1.0629	NON-ALLEREGEN	NON-TOXIN	-0.3	-0.91	0.25	2.5	1100.38
	INANAGIEGT	319	0.72	ANTIGEN	1.5635	NON-ALLEREGEN	NON-TOXIN	0.02	0.06	-0.16	-1	959.17
	KNTIDVTIPQ	258	0.72	ANTIGEN	1.0092	NON-ALLEREGEN	NON-TOXIN	-0.16	-0.42	0.05	0	1128.44
	DNNNQDGKRP	635	0.7	ANTIGEN	2.0099	NON-ALLEREGEN	NON-TOXIN	-0.68	-3.14	1.28	0	1157.3
	FKLSKKDGSV	351	0.69	ANTIGEN	1.0588	NON-ALLEREGEN	NON-TOXIN	-0.27	-0.64	0.68	2	1108.44
	YTPGETSATV	620	0.65	ANTIGEN	1.2939	NON-ALLEREGEN	NON-TOXIN	-0.05	-0.37	-0.22	-1	1025.21
	LTVSPSKIED	41	0.65	ANTIGEN	1.3139	NON-ALLEREGEN	NON-TOXIN	-0.14	-0.23	0.41	-1	1088.36
	GQQLDLSTLN	214	0.65	ANTIGEN	1.3890	NON-ALLEREGEN	NON-TOXIN	-0.14	-0.45	-0.19	-1	1088.34
	IETTSISGEK	532	0.63	ANTIGEN	1.3540	NON-ALLEREGEN	NON-TOXIN	-0.16	-0.53	0.52	-1	1064.3
	ATITFNDKVE	111	0.62	ANTIGEN	0.7068	NON-ALLEREGEN	NON-TOXIN	-0.13	-0.25	0.21	-1	1137.39
	KQDKDTKAPI	337	0.61	ANTIGEN	1.0584	NON-ALLEREGEN	NON-TOXIN	-0.47	-1.82	1.25	1	1143.44
	TVTEDHVKDY	598	0.6	ANTIGEN	0.7931	NON-ALLEREGEN	NON-TOXIN	-0.28	-1.19	0.54	-1.5	1206.41
	DGKRPEKVSV	550	0.6	ANTIGEN	1.5206	NON-ALLEREGEN	NON-TOXIN	-0.44	-1.37	1.23	1	1114.4
	DGSVVKDNQK	357	0.6	ANTIGEN	0.7974	NON-ALLEREGEN	NON-TOXIN	-0.4	-1.46	0.97	0	1089.31
	THSNYYSGQS	229	0.6	ANTIGEN	1.0438	NON-ALLEREGEN	NON-TOXIN	-0.25	-1.63	-0.42	0.5	1143.27
	VELYQDGKAT	649	0.59	ANTIGEN	0.5820	NON-ALLEREGEN	NON-TOXIN	-0.18	-0.7	0.27	-1	1123.37
	HVKDYTTDIN	603	0.57	ANTIGEN	0.5999	NON-ALLEREGEN	NON-TOXIN	-0.27	-1.16	0.23	-0.5	1205.43
	DANGIANIKA	373	0.56	ANTIGEN	0.7521	NON-ALLEREGEN	NON-TOXIN	-0.07	-0.04	0.13	0	986.23
	LYKQDDNQNT	455	0.55	ANTIGEN	1.1540	NON-ALLEREGEN	NON-TOXIN	-0.48	-2.31	0.53	0	1238.42
	GIEGTVKGEL	324	0.54	ANTIGEN	1.3241	NON-ALLEREGEN	NON-TOXIN	-0.02	-0.03	0.35	-1	1002.29
	KDQIQGGQQL	208	0.54	ANTIGEN	0.7039	NON-ALLEREGEN	NON-TOXIN	-0.3	-1.39	0.32	0	1114.39
	WDDKDNQDGK	730	0.52	ANTIGEN	1.9436	NON-ALLEREGEN	NON-TOXIN	-0.59	-3.01	1.5	-2	1220.35
