# Supplementary material for: Designing a Next-Generation Multiepitope-Based Vaccine against Staphylococcus aureus Using Reverse Vaccinology Approaches
Source: Pathogens. 2023 Feb 25;12(3):376. doi: 10.3390/pathogens12030376 (PMC10058999; doi:10.3390/pathogens12030376)
Supplement: Supplementary file 1 [file pathogens-12-00376-s001.zip › Supplementary Table S2.xlsx]

## Sheet: Sheet1
Supplementary Table 2. Predicted CTL epitopes from S.aureus Collagen binding protein with their corresponding MHC Class I alleles and their immunogenic properties. The final selected epitopes to design multi-epitope vaccine construct from proteins has been highlighted in green colour.
Uniprot ID	Supertype	Epitope	Immunogenicity	NetMHCpan 4.0 Allele	%Rank	Position	Antigencity	Antigencity Score	Allergicity	Toxicity	Hydrophobicity	Hydropathicity	Hydrophilicity	Charge	Mol wt.
Q53654	A1	VTEDHVKDY	-0.04386	HLA-A*01:01	0.038	973	ANTIGEN	0.7680	NON-ALLERGEN	NON - TOXIN	-0.29	-1.24	0.64	-1.5	1105.29
		VTGTHSNYY	-0.08179	HLA-A*01:01	0.055	226	ANTIGEN	1.0423	NON-ALLERGEN	NON - TOXIN	-0.1	-0.86	-0.77	0.5	1041.21
		EAGTSSVFY	-0.16353	HLA-A*01:01	0.342	166	ANTIGEN	0.6912	NON-ALLERGEN	NON - TOXIN	0.03	0.14	-0.4	-1	960.12
		TSDDKVATI	-0.08592	HLA-A*01:01	0.704	143	ANTIGEN	1.0935	NON-ALLERGEN	nON - TOXIN	-0.18	-0.29	0.52	-1	949.14
		NVTGTHSNY	-0.02845	HLA-A*01:01	0.809	225	ANTIGEN	1.6658	NON-ALLERGEN	NON - TOXIN	-0.18	-1.1	-0.49	0.5	992.14
		GEDTTPEGY	0.17792	HLA-A*01:01	0.992	508	ANTIGEN	0.6148	NON-ALLERGEN	NON - TOXIN	-0.23	-1.73	0.66	-3	968.06
		KAKGQQVKY	-0.3489	HLA-A*01:01	0.994	1054	ANTIGEN	1.6073	NON-ALLERGEN	NON - TOXIN	-0.41	-1.6	0.57	3	1049.37
		MKDTDNQGY	-0.01619	HLA-A*01:01	1.11	411	ANTIGEN	1.1004	NON-ALLERGEN	NON - TOXIN	-0.4	-2.04	0.6	-1	1071.25
		IDVTIPQGY	0.09366	HLA-A*01:01	1.232	261	ANTIGEN	0.5744	NON-ALLERGEN	NON - TOXIN	0.06	0.24	-0.51	-1	1005.27
		TPDGATITF	0.25094	HLA-A*01:01	1.279	107	ANTIGEN	0.9339	NON-ALLERGEN	NON - TOXIN	0.05	0.17	-0.33	-1	922.12
	A2	KVNGYTTHV	0.1166	HLA-A*02:01	0.226	1069	ANTIGEN	1.5081	NON-ALLERGEN	NON TOXIN	-0.14	-0.59	-0.38	1.5	1018.27
		QLDLSTLNI	-0.14166	HLA-A*02:01	1.166	216	ANTIGEN	1.6096	NON-ALLERGEN	NON TOXIN	-0.02	0.43	-0.43	-1	1016.3
		KLSKKDGSV	-0.52788	HLA-A*02:01	1.929	352	ANTIGEN	1.3890	NON-ALLERGEN	NON TOXIN	-0.37	-1.02	1.03	2	961.25
		NVLKFMVFI	-0.16866	HLA-A*02:01	2.075	4	ANTIGEN	0.7544	NON-ALLERGEN	NON TOXIN	0.23	1.87	-1.08	1	1110.56
		YSKTVPLTV	0.01214	HLA-A*02:01	2.169	88	ANTIGEN	0.6181	NON-ALLERGEN	NON TOXIN	-0.02	0.36	-0.51	1	1007.32
		GILGLYLIL	0.08462	HLA-A*02:01	2.231	1169	ANTIGEN	0.9731	NON-ALLERGEN	NON TOXIN	0.44	2.46	-1.46	0	974.41
		KIEGYSKTV	-0.25205	HLA-A*02:01	2.284	84	ANTIGEN	0.7718	NON-ALLERGEN	NON TOXIN	-0.2	-0.64	0.37	1	1024.31
		TSDDKVATI	-0.08592	HLA-A*02:01	2.464	143	ANTIGEN	1.0935	NON-ALLERGEN	NON TOXIN	-0.18	-0.29	0.52	-1	949.14
		ATITFNDKV	0.08289	HLA-A*02:01	2.877	111	ANTIGEN	0.5682	NON-ALLERGEN	NON TOXIN	-0.08	0.11	-0.1	0	1008.26
		TFNDKVEKL	-0.19242	HLA-A*02:01	3.229	114	ANTIGEN	0.6370	NON-ALLERGEN	NON TOXIN	-0.3	-0.91	0.67	0	1093.37
	A3	KTKDVSAQK	-0.19787	HLA-A*03:01	0.018	431	ANTIGEN	1.6457	NON-ALLERGEN	NON TOXIN	-0.48	-1.58	1.12	2	1004.27
		KTKPENPLK	-0.00559	HLA-A*03:01	0.039	1141	ANTIGEN	0.5756	NON-ALLERGEN	NON TOXIN	-0.48	-2.09	1.11	2	1054.38
		VTNKYTPKK	-0.32152	HLA-A*03:01	0.059	1087	ANTIGEN	1.0987	NON-ALLERGEN	NON TOXIN	-0.42	-1.7	0.51	3	1078.4
		ITFNDKVEK	-0.05657	HLA-A*03:01	0.238	113	ANTIGEN	1.1531	NON-ALLERGEN	NON TOXIN	-0.28	-0.83	0.67	0	1093.37
		KIQNGDMIK	-0.06067	HLA-A*03:01	0.342	66	ANTIGEN	0.911	NON-ALLERGEN	NON TOXIN	-0.26	-0.87	0.5	1	1046.39
		MTFDDKNGK	-0.10674	HLA-A*03:01	0.566	58	ANTIGEN	1.8150	NON-ALLERGEN	NON TOXIN	-0.38	-1.63	0.89	0	1055.29
		YVSKDITIK	-0.0133	HLA-A*03:01	0.775	200	ANTIGEN	0.9992	NON-ALLERGEN	NON TOXIN	-0.15	-0.1	0.17	1	1066.39
		TTPEGYTKK	0.03343	HLA-A*03:01	0.996	511	ANTIGEN	0.8267	NON-ALLERGEN	NON TOXIN	-0.36	-1.86	0.61	1	1024.26
		VLKQDKDTK	-0.32656	HLA-A*03:01	1.453	335	ANTIGEN	1.0904	NON-ALLERGEN	NON TOXIN	-0.5	-1.66	1.28	1	1074.37
		YQDGKATGK	-0.07931	HLA-A*03:01	1.488	1026	ANTIGEN	1.8696	NON-ALLERGEN	NON TOXIN	-0.36	-1.76	0.67	1	967.17
	A24	TFNDKVEKL	-0.19242	HLA-A*24:02	0.344	114	ANTIGEN	0.6370	NON- ALLERGEN	NON TOXIN	-0.3	-0.91	0.67	0	1093.37
		SYNSFSINY	-0.10176	HLA-A*24:02	0.37	271	ANTIGEN	0.9566	NON- ALLERGEN	NON TOXIN	-0.08	-0.52	-0.84	0	1094.26
		KFMVFIMLL	0.06914	HLA-A*24:02	0.635	7	ANTIGEN	1.7858	NON- ALLERGEN	NON TOXIN	0.33	2.42	-1.28	1	1141.68
		KAPIANVKF	0.07117	HLA-A*24:02	0.723	343	ANTIGEN	0.4093	NON- ALLERGEN	NON TOXIN	-0.06	0.24	-0.07	2	987.33
		LLNIITPLF	0.28212	HLA-A*24:02	0.815	14	ANTIGEN	0.6552	NON- ALLERGEN	NON TOXIN	0.31	1.93	-1.3	0	1043.46
		VKPTIYFKL	0.13438	HLA-A*24:02	1.611	447	ANTIGEN	1.6698	NON- ALLERGEN	NON TOXIN	0	0.43	-0.48	2	1108.52
		THVRWFLNI	0.37824	HLA-A*24:02	1.904	186	ANTIGEN	0.8056	NON- ALLERGEN	NON TOXIN	-0.02	0.28	-0.97	1.5	1185.53
		VFIMLLNII	-0.08244	HLA-A*24:02	2.188	10	ANTIGEN	1.7616	NON- ALLERGEN	NON TOXIN	0.45	2.94	-1.57	0	1075.57
		TPDGATITF	0.25094	HLA-A*24:02	2.408	107	ANTIGEN	0.9339	NON- ALLERGEN	NON TOXIN	0.05	0.17	-0.33	-1	922.12
		TFDDKNGKI	-0.28397	HLA-A*24:02	2.927	59	ANTIGEN	1.3222	NON- ALLERGEN	NON TOXIN	-0.33	-1.34	0.83	0	1037.26
	A26	NVTGTHSNY	-0.02845	HLA-A*26:01	0.045	225	ANTIGEN	1.6658	NON-ALLERGEN	NON TOXIN	-0.18	-1.1	-0.49	0.5	992.14
		EAGTSSVFY	-0.16353	HLA-A*26:01	0.309	166	ANTIGEN	0.6912	NON-ALLERGEN	NON TOXIN	0.03	0.14	-0.4	-1	960.12
		EVNGKSFNH	-0.23871	HLA-A*26:01	0.447	306	ANTIGEN	1.7188	NON-ALLERGEN	NON TOXIN	-0.26	-1.31	0.24	0.5	1031.22
		KAKGQQVKY	-0.3489	HLA-A*26:01	0.845	1054	ANTIGEN	1.6073	NON-ALLERGEN	NON TOXIN	-0.41	-1.6	0.57	3	1049.37
		VTEDHVKDY	-0.04386	HLA-A*26:01	1.019	973	ANTIGEN	0.768	NON-ALLERGEN	NON TOXIN	-0.29	-1.24	0.64	-1.5	1105.29
		SYNSFSINY	-0.10176	HLA-A*26:01	1.046	271	ANTIGEN	0.9566	NON-ALLERGEN	NON TOXIN	-0.08	-0.52	-0.84	0	1094.26
		VTGTHSNYY	-0.08179	HLA-A*26:01	1.076	226	ANTIGEN	1.0423	NON-ALLERGEN	NON TOXIN	-0.1	-0.86	-0.77	0.5	1041.21
		DQIQGGQQL	-0.1739	HLA-A*26:01	1.105	209	ANTIGEN	0.79	NON-ALLERGEN	NON TOXIN	-0.21	-1.11	0.02	-1	986.2
		TVKGELKVL	-0.10672	HLA-A*26:01	1.191	328	ANTIGEN	0.8738	NON-ALLERGEN	NON TOXIN	-0.08	0.4	0.22	1	986.36
		TPDGATITF	0.25094	HLA-A*26:01	1.588	107	ANTIGEN	0.9339	NON-ALLERGEN	NON TOXIN	0.05	0.17	-0.33	-1	922.12
	B7	TPDGATITF	0.25094	HLA-B*07:02	0.125	107	ANTIGEN	0.9339	NON- ALLERGEN	NON TOXIN	0.05	0.17	-0.33	-1	922.12
		TVKGELKVL	-0.10672	HLA-B*07:02	1.589	328	ANTIGEN	0.8738	NON- ALLERGEN	NON TOXIN	-0.08	0.4	0.22	1	986.36
		QPKDNKTKP	-0.35022	HLA-B*07:02	1.651	1136	ANTIGEN	1.1402	NON- ALLERGEN	NON TOXIN	-0.63	-2.9	1.33	2	1055.32
		KPTIYFKLY	0.06464	HLA-B*07:02	2.837	448	ANTIGEN	1.6477	NON- ALLERGEN	NON TOXIN	-0.06	-0.18	-0.57	2	1172.56
		YPEKPKDKT	-0.50558	HLA-B*07:02	2.953	1101	ANTIGEN	0.5365	NON- ALLERGEN	NON TOXIN	-0.55	-2.66	1.37	1	1105.37
		SEAGTSSVF	-0.18663	HLA-B*07:02	3.065	165	ANTIGEN	1.0123	NON- ALLERGEN	NON TOXIN	0	0.2	-0.11	-1	884.02
		DQIQGGQQL	-0.1739	HLA-B*07:02	3.172	209	ANTIGEN	0.7900	NON- ALLERGEN	NON TOXIN	-0.21	-1.11	0.02	-1	986.2
		YSKTVPLTV	0.01214	HLA-B*07:02	3.679	88	ANTIGEN	0.6181	NON- ALLERGEN	NON TOXIN	-0.02	0.36	-0.51	1	1007.32
		KVNGYTTHV	0.1166	HLA-B*07:02	3.934	1069	ANTIGEN	1.5081	NON- ALLERGEN	NON TOXIN	-0.14	-0.59	-0.38	1.5	1018.27
		VPLTVKGEQ	-0.04024	HLA-B*07:02	4.125	92	ANTIGEN	0.7968	NON- ALLERGEN	NON TOXIN	-0.1	-0.16	0.11	0	970.27
	B8	TFNDKVEKL	-0.19242	HLA-B*08:01	0.242	114	ANTIGEN	0.6370	NON-ALLERGEN	NON TOXIN	-0.3	-0.91	0.67	0	1093.37
		TPDGATITF	0.25094	HLA-B*08:01	0.607	107	ANTIGEN	0.9339	NON-ALLERGEN	NON TOXIN	0.05	0.17	-0.33	-1	922.12
		YSKTVPLTV	0.01214	HLA-B*08:01	0.617	88	ANTIGEN	0.6181	NON-ALLERGEN	NON TOXIN	-0.02	0.36	-0.51	1	1007.32
		ANGEKVKTL	-0.21871	HLA-B*08:01	0.646	937	ANTIGEN	1.4478	NON-ALLERGEN	NON TOXIN	-0.24	-0.68	0.56	1	959.24
		EGKKIEYTV	-0.04359	HLA-B*08:01	0.784	965	ANTIGEN	1.3831	NON-ALLERGEN	NON TOXIN	-0.24	-0.94	0.67	0	1066.35
		TVKGELKVL	-0.10672	HLA-B*08:01	0.8	328	ANTIGEN	0.8738	NON-ALLERGEN	NON TOXIN	-0.08	0.4	0.22	1	986.36
		EFEVQGRNL	0.03304	HLA-B*08:01	1.717	130	ANTIGEN	1.6709	NON-ALLERGEN	NON TOXIN	-0.28	-0.9	0.4	-1	1091.32
		DQIQGGQQL	-0.1739	HLA-B*08:01	1.735	209	ANTIGEN	0.7900	NON-ALLERGEN	NON TOXIN	-0.21	-1.11	0.02	-1	986.2
		TFDDKNGKI	-0.28397	HLA-B*08:01	1.88	59	ANTIGEN	1.3222	NON-ALLERGEN	NON TOXIN	-0.33	-1.34	0.83	0	1037.26
		TSDDKVATI	-0.08592	HLA-B*08:01	2.081	143	ANTIGEN	1.0935	NON-ALLERGEN	NON TOXIN	-0.18	-0.29	0.52	-1	949.14
	B27	SYNSFSINY	-0.10176	HLA-B*27:05	2.562	271	ANTIGEN	0.9566	NON-ANTIGEN	NON TOXIN	-0.08	-0.52	-0.84	0	1094.26
		YQDGKATGK	-0.07931	HLA-B*27:05	3.819	1026	ANTIGEN	1.8696	NON-ANTIGEN	NON TOXIN	-0.36	-1.76	0.67	1	967.17
		VKPTIYFKL	0.13438	HLA-B*27:05	3.894	447	ANTIGEN	1.6698	NON-ANTIGEN	NON TOXIN	0	0.43	-0.48	2	1108.52
		SKITVDNTK	0.16056	HLA-B*27:05	4.061	250	ANTIGEN	0.4621	NON-ANTIGEN	NON TOXIN	-0.32	-0.92	0.6	1	1005.26
		KELPKTGMK	-0.26222	HLA-B*27:05	5.202	1149	ANTIGEN	0.5956	NON-ANTIGEN	NON TOXIN	-0.36	-1.36	0.94	2	1031.41
		VKGELKVLK	-0.07369	HLA-B*27:05	5.227	329	ANTIGEN	0.5914	NON-ANTIGEN	NON TOXIN	-0.18	0.04	0.6	2	1013.43
		TPDGATITF	0.25094	HLA-B*27:05	5.338	107	ANTIGEN	0.9339	NON-ANTIGEN	NON TOXIN	0.05	0.17	-0.33	-1	922.12
		GKRPEKVSV	-0.16168	HLA-B*27:05	5.423	925	ANTIGEN	1.3590	NON-ANTIGEN	NON TOXIN	-0.41	-1.13	1.03	2	999.3
		NQDGKRPEK	-0.07084	HLA-B*27:05	5.522	922	ANTIGEN	2.3538	NON-ANTIGEN	NON TOXIN	-0.73	-3.14	1.71	1	1071.28
		KTKDVSAQK	-0.19787	HLA-B*27:05	5.523	431	ANTIGEN	1.6457	NON-ANTIGEN	NON TOXIN	-0.48	-1.58	1.12	2	1004.27
	B39	DQIQGGQQL	-0.1739	HLA-B*39:01	0.102	209	ANTIGEN	0.79	NON-ALLERGEN	NON TOXIN	-0.21	-1.11	0.02	-1	986.2
		NKTKPENPL	-0.13289	HLA-B*39:01	0.209	1140	ANTIGEN	0.4455	NON-ALLERGEN	NON TOXIN	-0.43	-2.04	0.8	1	1040.31
		TPDGATITF	0.25094	HLA-B*39:01	0.336	107	ANTIGEN	0.9339	NON-ALLERGEN	NON TOXIN	0.05	0.17	-0.33	-1	922.12
		NHTVHNINA	0.18809	HLA-B*39:01	0.467	313	ANTIGEN	0.4162	NON-ALLERGEN	NON TOXIN	-0.15	-0.79	-0.51	1	1019.22
		THVRWFLNI	0.37824	HLA-B*39:01	0.558	186	ANTIGEN	0.8056	NON-ALLERGEN	NON TOXIN	-0.02	0.28	-0.97	1.5	1185.53
		TKNTIDVTI	0.24496	HLA-B*39:01	0.65	257	ANTIGEN	0.9440	NON-ALLERGEN	NON TOXIN	-0.11	0.02	-0.01	0	1004.28
		TKDVSAQKV	-0.29929	HLA-B*39:01	1.086	432	ANTIGEN	1.4359	NON-ALLERGEN	NON TOXIN	-0.3	-0.68	0.62	1	975.23
		SEAGTSSVF	-0.18663	HLA-B*39:01	1.377	165	ANTIGEN	1.0123	NON-ALLERGEN	NON TOXIN	0	0.2	-0.11	-1	884.02
		TSDDKVATI	-0.08592	HLA-B*39:01	1.54	143	ANTIGEN	1.0935	NON-ALLERGEN	NON TOXIN	-0.18	-0.29	0.52	-1	949.14
		TFNDKVEKL	-0.19242	HLA-B*39:01	1.62	114	ANTIGEN	0.6370	NON-ALLERGEN	NON TOXIN	-0.3	-0.91	0.67	0	1093.37
	B44	SEAGTSSVF	-0.18663	HLA-B*40:01	0.115	165	ANTIGEN	1.0123	NON-ALLERGEN	NON TOXIN	0	0.2	-0.11	-1	884.02
		GEQVGQAVI	-0.01496	HLA-B*40:01	0.138	98	ANTIGEN	0.7002	NON-ALLERGEN	NON TOXIN	0.04	0.38	-0.21	-1	900.14
		IEGTVKGEL	-0.02564	HLA-B*40:01	0.276	325	ANTIGEN	0.7789	NON-ALLERGEN	NON TOXIN	-0.04	0.01	0.39	-1	945.22
		KEEVNGKSF	-0.17902	HLA-B*40:01	0.368	304	ANTIGEN	1.8063	NON-ALLERGEN	NON TOXIN	-0.34	-1.39	0.94	0	1037.26
		DQIQGGQQL	-0.1739	HLA-B*40:01	0.721	209	ANTIGEN	0.7900	NON-ALLERGEN	NON TOXIN	-0.21	-1.11	0.02	-1	986.2
		GEDTTPEGY	0.17792	HLA-B*40:01	0.963	508	ANTIGEN	0.6148	NON-ALLERGEN	NON TOXIN	-0.23	-1.73	0.66	-3	968.06
		GEKVKTLDV	-0.19832	HLA-B*40:01	1.76	939	ANTIGEN	1.4929	NON-ALLERGEN	NON TOXIN	-0.22	-0.41	0.76	0	988.28
		FEVQGRNLT	-0.03338	HLA-B*40:01	1.914	131	ANTIGEN	1.2828	NON-ALLERGEN	NON TOXIN	-0.23	-0.59	0.02	0	1063.31
		KDITIKDQI	-0.0401	HLA-B*40:01	2.023	203	ANTIGEN	1.0786	NON-ALLERGEN	NON TOXIN	-0.26	-0.61	0.71	0	1073.39
		IEYTVTEDH	0.21206	HLA-B*40:01	2.678	969	ANTIGEN	1.1265	NON-ALLERGEN	NON TOXIN	-0.16	-0.86	0.23	-2.5	1106.28
	B58	TSATVTKNW	-0.05728	HLA-B*58:01	0.008	999	ANTIGEN	0.8697	NON-ALLERGEN	NON TOXIN	-0.15	-0.58	-0.34	1	1007.23
		KAKGQQVKY	-0.3489	HLA-B*58:01	0.48	1054	ANTIGEN	1.6073	NON-ALLERGEN	NON TOXIN	-0.41	-1.6	0.57	3	1049.37
		KAPIANVKF	0.07117	HLA-B*58:01	0.708	343	ANTIGEN	0.4093	NON-ALLERGEN	NON TOXIN	-0.06	0.24	-0.07	2	987.33
		YSKTVPLTV	0.01214	HLA-B*58:01	1.078	88	ANTIGEN	0.6181	NON-ALLERGEN	NON TOXIN	-0.02	0.36	-0.51	1	1007.32
		VTGTHSNYY	-0.08179	HLA-B*58:01	1.153	226	ANTIGEN	1.0423	NON-ALLERGEN	NON TOXIN	-0.1	-0.86	-0.77	0.5	1041.21
		LLNIITPLF	0.28212	HLA-B*58:01	1.311	14	ANTIGEN	0.6552	NON-ALLERGEN	NON TOXIN	0.31	1.93	-1.3	0	1043.46
		TSDDKVATI	-0.08592	HLA-B*58:01	2.554	143	ANTIGEN	1.0935	NON-ALLERGEN	NON TOXIN	-0.18	-0.29	0.52	-1	949.14
		EDGTTKVTW	-0.05762	HLA-B*58:01	2.632	476	ANTIGEN	1.5106	NON-ALLERGEN	NON TOXIN	-0.21	-1.12	0.32	-1	1036.23
		TPDGATITF	0.25094	HLA-B*58:01	2.811	107	ANTIGEN	0.9339	NON-ALLERGEN	NON TOXIN	0.05	0.17	-0.33	-1	922.12
		VTEDHVKDY	-0.04386	HLA-B*58:01	3.12	973	ANTIGEN	0.7680	NON-ALLERGEN	NON TOXIN	-0.29	-1.24	0.64	-1.5	1105.29
	B62	KAKGQQVKY	-0.3489	HLA-B*15:01	0.138	1054	ANTIGEN	1.6073	NON-ALLERGEN	NON TOXIN	-0.41	-1.6	0.57	3	1049.37
		LLNIITPLF	0.28212	HLA-B*15:01	0.567	14	ANTIGEN	0.6552	NON-ALLERGEN	NON TOXIN	0.31	1.93	-1.3	0	1043.46
		SEAGTSSVF	-0.18663	HLA-B*15:01	0.641	165	ANTIGEN	1.0123	NON-ALLERGEN	NON TOXIN	0	0.2	-0.11	-1	884.02
		NVTGTHSNY	-0.02845	HLA-B*15:01	0.927	225	ANTIGEN	1.6658	NON-ALLERGEN	NON TOXIN	-0.18	-1.1	-0.49	0.5	992.14
		DQIQGGQQL	-0.1739	HLA-B*15:01	1.429	209	ANTIGEN	0.7900	NON-ALLERGEN	NON TOXIN	-0.21	-1.11	0.02	-1	986.2
		SYNSFSINY	-0.10176	HLA-B*15:01	1.894	271	ANTIGEN	0.9566	NON-ALLERGEN	NON TOXIN	-0.08	-0.52	-0.84	0	1094.26
		TVKGELKVL	-0.10672	HLA-B*15:01	2.133	328	ANTIGEN	0.8738	NON-ALLERGEN	NON TOXIN	-0.08	0.4	0.22	1	986.36
		KAPIANVKF	0.07117	HLA-B*15:01	2.403	343	ANTIGEN	0.4093	NON-ALLERGEN	NON TOXIN	-0.06	0.24	-0.07	2	987.33
		VTEDHVKDY	-0.04386	HLA-B*15:01	2.71	973	ANTIGEN	0.7680	NON-ALLERGEN	NON TOXIN	-0.29	-1.24	0.64	-1.5	1105.29
		KEEVNGKSF	-0.17902	HLA-B*15:01	3.482	304	ANTIGEN	1.8063	NON-ALLERGEN	NON TOXIN	-0.34	-1.39	0.94	0	1037.26
