# Supplementary material for: Designing a Next-Generation Multiepitope-Based Vaccine against Staphylococcus aureus Using Reverse Vaccinology Approaches
Source: Pathogens. 2023 Feb 25;12(3):376. doi: 10.3390/pathogens12030376 (PMC10058999; doi:10.3390/pathogens12030376)
Supplement: Supplementary file 1 [file pathogens-12-00376-s001.zip › Supplementary Table S3.xlsx]

## Sheet: Sheet1
Supplementary Table 3. Predicted HTL epitopes from S.aureus Collagen binding protein with their corresponding MHC Class II alleles and their immunogenic properties. The final selected epitopes to design multi-epitope vaccine construct from proteins has been highlighted in green colour.
Uniprot_ID	Epitope	Percentile_Rank	MHC II ALLELES	Peptide Position	Smm align IC50 value	Antigencity	Antigencity Score	Allergicity	Toxicity	Hydrophobicity	Hydropathicity	Hydrophilicity	Charge	Mol wt.
Q53654	NVLKFMVFIMLLNII	0.21	HLA-DRB4*01:01	18-15	36	ANTIGEN	1.2706	NON-ALLERGEN	NON-TOXIN	0.28	2.12	-1.2	1	1808.61
	VLKFMVFIMLLNIIT	0.42	HLA-DRB4*01:0	5--19	50	ANTIGEN	1.3372	NON-ALLERGEN	NON-TOXIN	0.31	2.31	-1.24	1	1795.61
	KTGMKIITSWITWVF	0.18	HLA-DRB1*15:01	1153-1167	24	ANTIGEN	0.7741	NON-ALLERGEN	NON-TOXIN	0.1	0.63	-0.83	2	1811.45
	TGMKIITSWITWVFI	0.18	HLA-DRB1*15:01	1154-1168	24	ANTIGEN	0.7733	NON-ALLERGEN	NON-TOXIN	0.22	1.19	-1.15	1	1796.44
	ITWVFIGILGLYLIL	0.25	HLA-DPA1*03:01/DPB1*04:02	1163-1177	19	ANTIGEN	1.0102	NON-ALLERGEN	NON-TOXIN	0.45	2.43	-1.63	0	1734.46
	WITWVFIGILGLYLI	0.25	HLA-DPA1*03:01/DPB1*04:02	1162-1176	19	ANTIGEN	0.8291	NON-ALLERGEN	NON-TOXIN	0.44	2.12	-1.74	0	1807.51
	SWITWVFIGILGLYL	0.28	HLA-DPA1*03:01/DPB1*04:02	1161-1175	20	ANTIGEN	0.63	NON-ALLERGEN	NON-TOXIN	0.37	1.77	-1.6	0	1781.42
	TWVFIGILGLYLILR	0.28	HLA-DPA1*03:01/DPB1*04:02	1164-1178	20	ANTIGEN	0.4819	NON-ALLERGEN	NON-TOXIN	0.28	1.83	-1.31	1	1777.48
	KNVLKFMVFIMLLNI	0.41	HLA-DRB4*01:01	3--17	49	ANTIGEN	1.2313	NON-ALLERGEN	NON-TOXIN	0.16	1.56	-0.88	2	1823.62
	IGILGLYLILRKRFN	0.42	HLA-DRB1*11:01	1168-1182	2	ANTIGEN	1.2313	NON-ALLERGEN	NON-TOXIN	0.16	1.56	-0.88	2	1823.62
