# Supplementary material for: Designing a Next-Generation Multiepitope-Based Vaccine against Staphylococcus aureus Using Reverse Vaccinology Approaches
Source: Pathogens. 2023 Feb 25;12(3):376. doi: 10.3390/pathogens12030376 (PMC10058999; doi:10.3390/pathogens12030376)
Supplement: Supplementary file 1 [file pathogens-12-00376-s001.zip › Supplementary Table S4.xlsx]

## Sheet: Sheet1
Supplementary Table 4. Population Coverage analysis of the final vaccine construct using the population coverage analysis tool of the IEDB database by keeping the default parameters on (109 countries covering 16 different geographical regions).
Geographical Area	Country	Population Coverage	Average_Hit	PC90
World		0.9951	19.4	7.42
East Asia		0.9876	16.98	4.82
East Asia	Japan	0.9902	17.21	5.23
	Korea; South	0.98	16.7	4.2
	Mongolia	0.988	13.14	3.68
Northeast Asia		0.9748	12.37	2.57
Northeast Asia	China	0.9741	12.17	2.53
	Hong Kong	0.6977	9.77	3.31
South Asia		0.9767	12.46	2.88
South Asia	India	0.9726	11.41	2.66
	Pakistan	0.74	7.68	0.38
	Sri Lanka	0.291	3.02	1.41
Southeast Asia		0.9674	14.03	2.51
Southeast Asia	Borneo	0.5244	1.26	0.42
	Indonesia	0.9399	9.72	1.51
	Malaysia	0.8776	9.02	0.82
	Philippines	0.9152	14.3	10.02
	Singapore	0.9488	11.04	1.56
	Taiwan	0.9888	17.41	4.67
	Thailand	0.9243	8.32	1.3
	Vietnam	0.8768	8.83	0.81
Southwest Asia		0.971	12.11	2.49
Southwest Asia	Iran	0.9543	11.5	1.75
	Israel	0.9608	11.02	1.8
	Jordan	0.9083	9.9	1.11
	Lebanon	0.9021	2.69	1.02
	Oman	0.8406	13.12	6.27
	Saudi Arabia	0.963	15.14	2.85
Europe		0.9981	23.47	12.75
Europe	Austria	0.9965	22.77	12.31
	Belgium	0.9919	19.64	10.77
	Bulgaria	0.9071	13.85	2.46
	Croatia	0.9946	19.89	11.15
	Czech Republic	0.9986	21.94	12.4
	Denmark	0.9057	3.08	1.07
	England	0.9992	26.3	14.27
	Finland	0.998	26.19	13.22
	France	0.9986	22.78	12.59
	Georgia	0.9936	16.87	5.02
	Germany	0.9995	25.99	14.3
	Greece	0.9656	4.01	1.97
	Ireland Northern	0.9982	24.63	13.03
	Ireland South	0.9982	25.3	13.26
	Italy	0.9798	16.63	4.19
	Macedonia	0.9659	3.36	1.53
	Netherlands	0.9244	3.63	1.39
	Norway	0.9743	4.71	2.34
	Poland	0.9975	22.72	12.29
	Portugal	0.9766	15.64	3.48
	Romania	0.9216	15.75	10.53
	Russia	0.9983	20.02	8.65
	Scotland	0.9067	4.96	1.09
	Serbia	0.3759	4.1	1.6
	Slovakia	0.8352	2.2	0.61
	Slovenia	0.9811	4.85	2.4
	Spain	0.9866	13.14	3.62
	Sweden	0.9998	31.12	21.6
	Turkey	0.96	7.18	1.58
	United Kingdom	0.718	1.71	0.35
	Wales	0.01	0.1	1.01
East Africa		0.9983	13.67	5.17
East Africa	Kenya	0.9976	12.94	4.59
	Uganda	0.9988	15.87	6.02
	Zambia	0.5498	6.91	2.22
	Zimbabwe	0.9955	10.73	4.04
West Africa		0.9996	14.28	5.55
West Africa	Burkina Faso	0.3016	3.31	1.43
	Cape Verde	0.8607	12.2	0.72
	Gambia	0.9982	5.88	3.81
	Guinea-Bissau	0.7344	8.85	0.38
	Ivory Coast	0.1752	1.8	1.21
	Liberia	0.9868	4.15	3
	Nigeria	0.979	3.89	2.63
	Senegal	0.6045	7.31	0.25
Central Africa		0.9981	12.34	4.97
Central Africa	Cameroon	0.9985	12.88	5.28
	Central African Republic	0.9892	4.83	2.44
	Congo	0.9934	5.61	3.39
	Equatorial Guinea	0.7062	1.76	0.34
	Gabon	0.9991	7.38	4.86
	Rwanda	0.7112	1.72	0.35
	Sao Tome and Principe	0.7292	8.68	0.37
North Africa		0.9801	12.08	2.89
North Africa	Algeria	0.8454	2.13	0.65
	Ethiopia	0.8987	2.72	0.99
	Mali	0.3749	4.29	1.6
	Morocco	0.967	13.26	2.5
	Sudan	0.9449	10.95	2.06
	Tunisia	0.9764	12.86	2.87
South Africa		0.5209	6.4	0.21
South Africa	South Africa	0.5209	6.4	0.21
West Indies		0.983	16.05	3.57
West Indies	Cuba	0.9711	15.38	2.84
	Jamaica	0.8577	2.29	0.7
	Martinique	0.6894	1.55	0.32
North America		0.9977	19.33	6.98
North America	Canada	0.9344	1.85	1.11
	Mexico	0.9981	14.17	3.98
	United States	0.998	19.38	7.06
Central America		0.9907	3.57	2.43
Central America	Costa Rica	0.9958	3.62	2.82
	Guatemala	0.3393	0.6	0.15
South America		0.9898	12.1	3.43
South America	Argentina	0.9906	11.63	3.25
	Bolivia	0.6156	0.77	0.26
	Brazil	0.996	15.31	4.22
	Chile	0.9535	12.88	1.83
	Colombia	0.9263	3.88	1.23
	Ecuador	0.9991	13.71	5.71
	Paraguay	0.4479	0.51	0.18
	Peru	0.992	15.27	10.51
	Venezuela	0.9889	11.36	2.8
Oceania		0.9895	15.33	3.91
Oceania	American Samoa	0.9078	15.44	10.2
	Australia	0.9617	15.81	2.94
	Cook Islands	0.9876	4.58	2.54
	Fiji	0.968	2.81	1.42
	Kiribati	0.7706	1.39	0.44
	Nauru	0.9119	2.51	1.07
	New Caledonia	0.9977	16.6	11.12
	New Zealand	0.9126	3.06	1.11
	Niue	0.9661	3.13	1.52
	Papua New Guinea	0.9968	13.97	4.61
	Samoa	0.9449	3.05	1.3
	Tokelau	0.8534	2.41	0.68
	Tonga	0.8278	2.07	0.58
