# Supplementary material for: Designing a Next-Generation Multiepitope-Based Vaccine against Staphylococcus aureus Using Reverse Vaccinology Approaches
Source: Pathogens. 2023 Feb 25;12(3):376. doi: 10.3390/pathogens12030376 (PMC10058999; doi:10.3390/pathogens12030376)
Supplement: Supplementary file 1 [file pathogens-12-00376-s001.zip › Supplementary Table S6.xlsx]

## Sheet: Sheet1
Supplementary Table 6. Disulfide engineering of the final multiepitope vaccine.
Res1 Chain	Res1 Seq #	Res1 AA	Res2 Chain	Res2 Seq #	Res2 AA	Chi3	Energy	Sum B-Factors
A	7	ILE	A	86	TYR	101.48	0.51	7.06
A	29	GLN	A	31	GLY	96.1	3.05	15.63
A	41	MET	A	96	ALA	123.6	4.84	7.91
A	55	ALA	A	85	ALA	89.48	0.77	10
A	56	THR	A	74	TYR	97.1	4.63	11.68
A	58	THR	A	73	ALA	119.19	5.37	11.43
A	84	ALA	A	192	GLY	75	2.49	10.82
A	94	LEU	A	202	MET	-116.75	5.23	7.3
A	98	TYR	A	102	ILE	118.19	6.7	10.65
A	121	ALA	A	122	TYR	-95.97	1.45	18.84
A	139	ILE	A	171	PRO	94.13	2.63	13.35
A	147	ILE	A	156	ALA	-112.35	3.8	13.02
A	151	VAL	A	155	HIS	122.19	4.34	14.15
A	170	GLY	A	173	VAL	73.6	3.51	11.1
A	184	ASN	A	197	PHE	92.2	1.38	11.16
